# Supplementary material for: Expression of β-globin by cancer cells promotes cell survival during blood-borne dissemination
Source: PubMed Central journal article supplement (PMC5321792; doi:10.1038/ncomms14344), 2017-02-09
Supplement: ncomms14344-s1.pdf [file ncomms14344-s1.pdf]

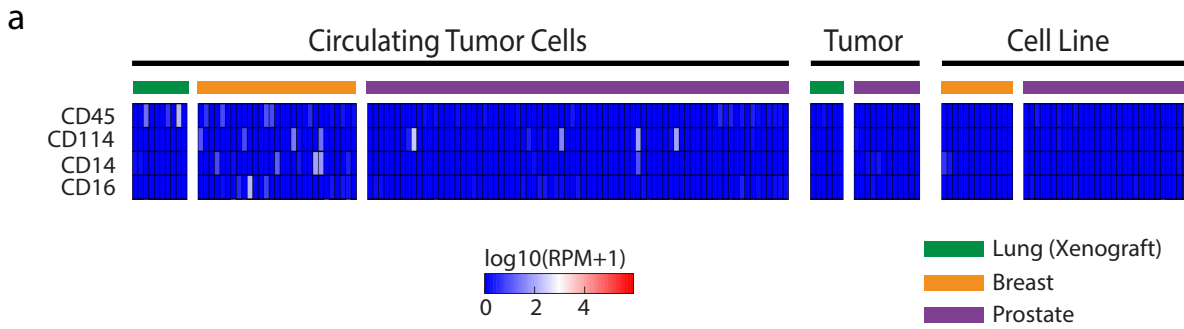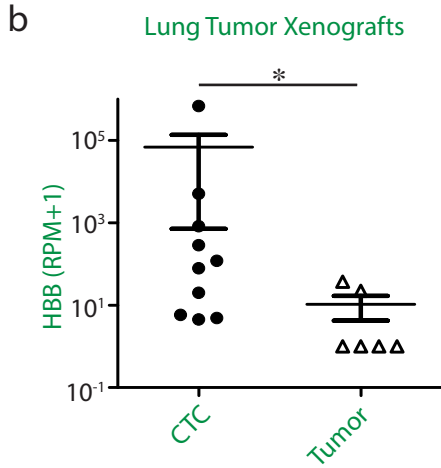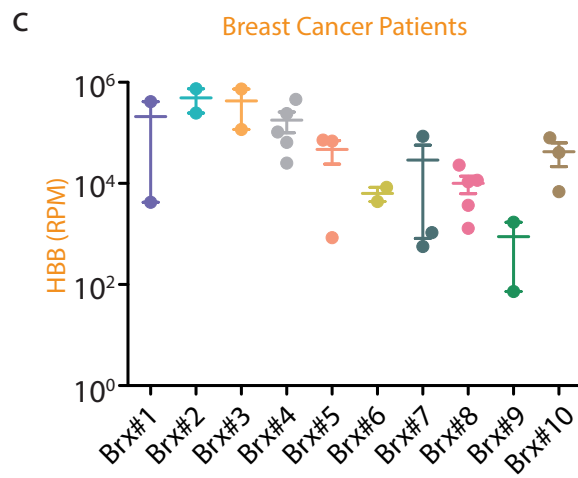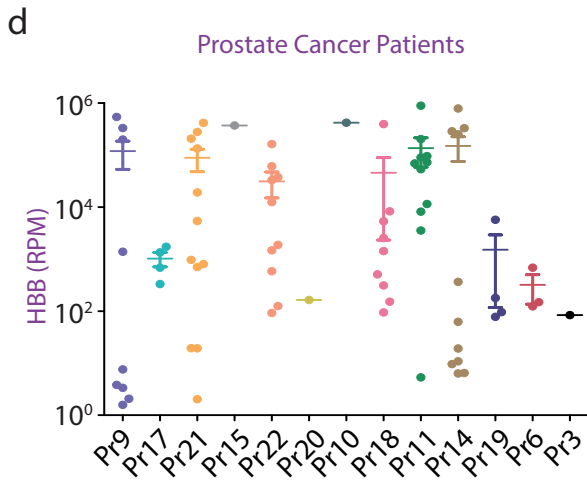

**Supplementary Figure 1. *HBB* expression in circulating tumor cells in multiple types of human cancer**

(a) Heatmap showing that the hematopoietic lineage markers (*CD45*, *CD114*, *CD14*, *CD16*) are absent or minimally expressed in lineage-confirmed CTCs from different cancer types. (b) Scatter plot showing increased expression of *HBB* in single CTCs or CTC-clusters isolated from the blood of lung tumor xenograft models, compared with single primary tumor cells. (c) Scatter plot showing the expression of *HBB* in single CTCs or CTC clusters across 10 breast cancer patients. (d) Scatter plot showing the expression of *HBB* in single CTCs across 13 prostate cancer patients. Data are represented as mean  $\pm$  SEM. \* denotes  $p < 0.05$  (t-Test).

a

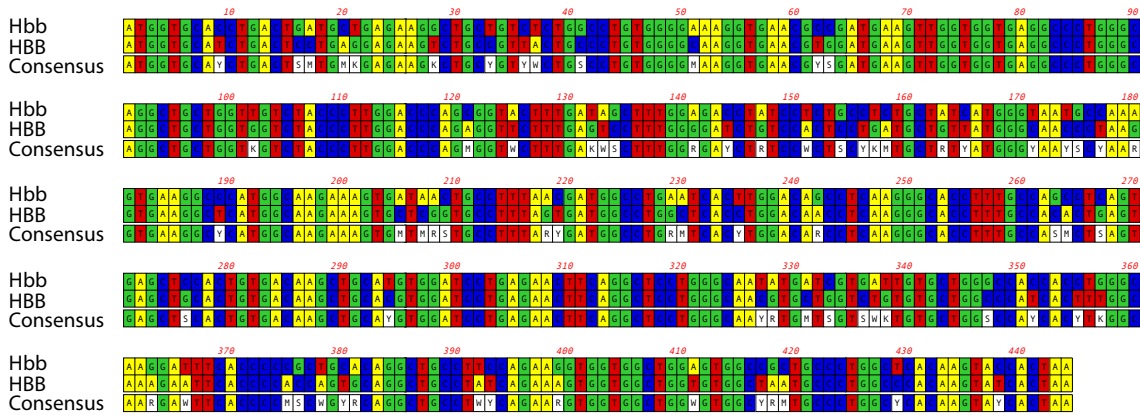

b

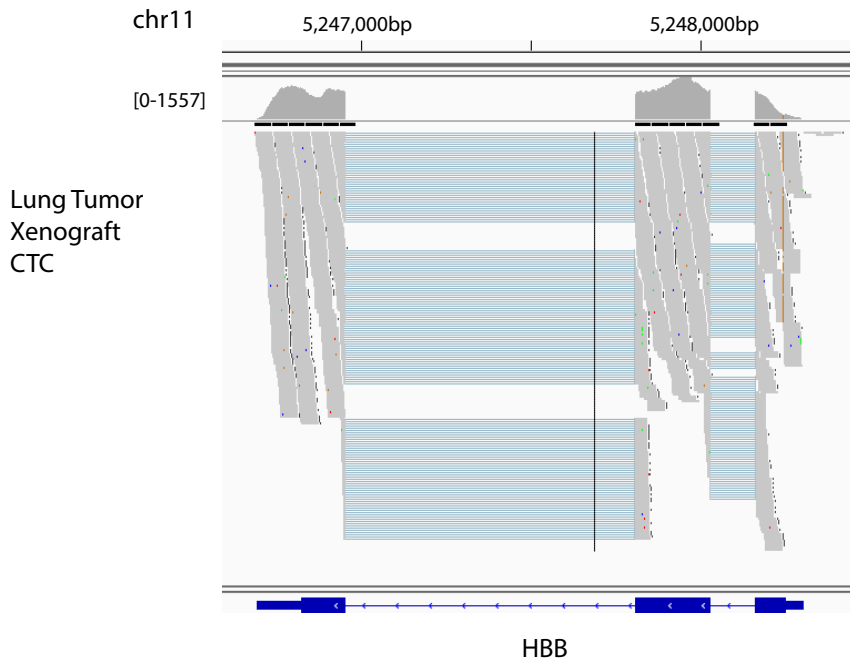

c

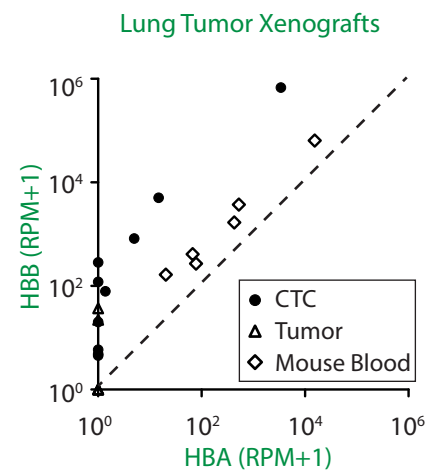

### Supplementary Figure 2. Tumor specific origin of *HBB* in circulating tumor cells from xenografts

(a) Comparison of human *HBB* and murine *Hbb* gene sequences showing multiple nucleotides that can be used to distinguish human *HBB* and murine *Hbb* reads in NextGen Seq. (b) A snapshot of an IGV window showing the *HBB* reads of a single CTC from a lung xenograft model aligned to the *HBB* gene locus in human genome. (c) Scatter plot demonstrating the specific upregulation of *HBB* but not *HBA* in CTCs from lung xenografts. Mouse blood samples acquired from the lung xenograft model, aligned to mouse genome mm10, serves as a control, demonstrating comparable expression of *HBB* and *HBA* in blood cells.

a

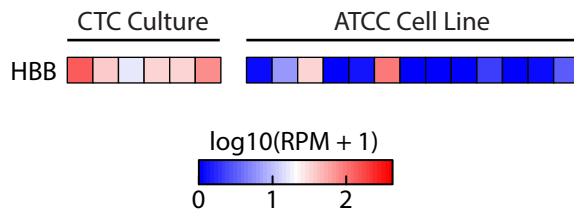

b

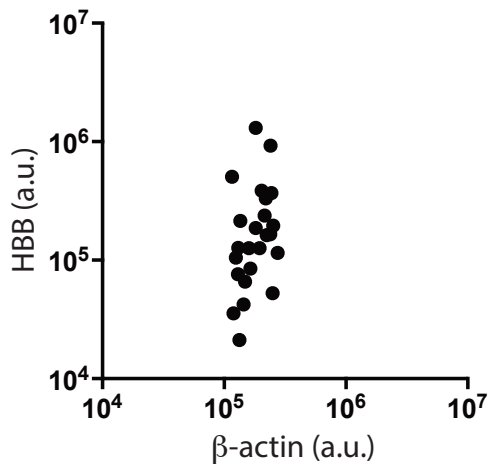

### Supplementary Figure 3. Expression of *HBB* in cultured breast CTCs

(a) Heatmap showing the expression of *HBB* in cultured breast CTC lines and standard ATCC breast cell lines. (b) Scatter plot showing a dynamic range of *HBB* protein levels in multiple cultured breast CTC lines (established from 6 breast cancer patients, at multiple time points during the treatment) detected by quantitative proteomics. A housekeeping gene  $\beta$ -actin was used as control showing the tight expression window among different samples.

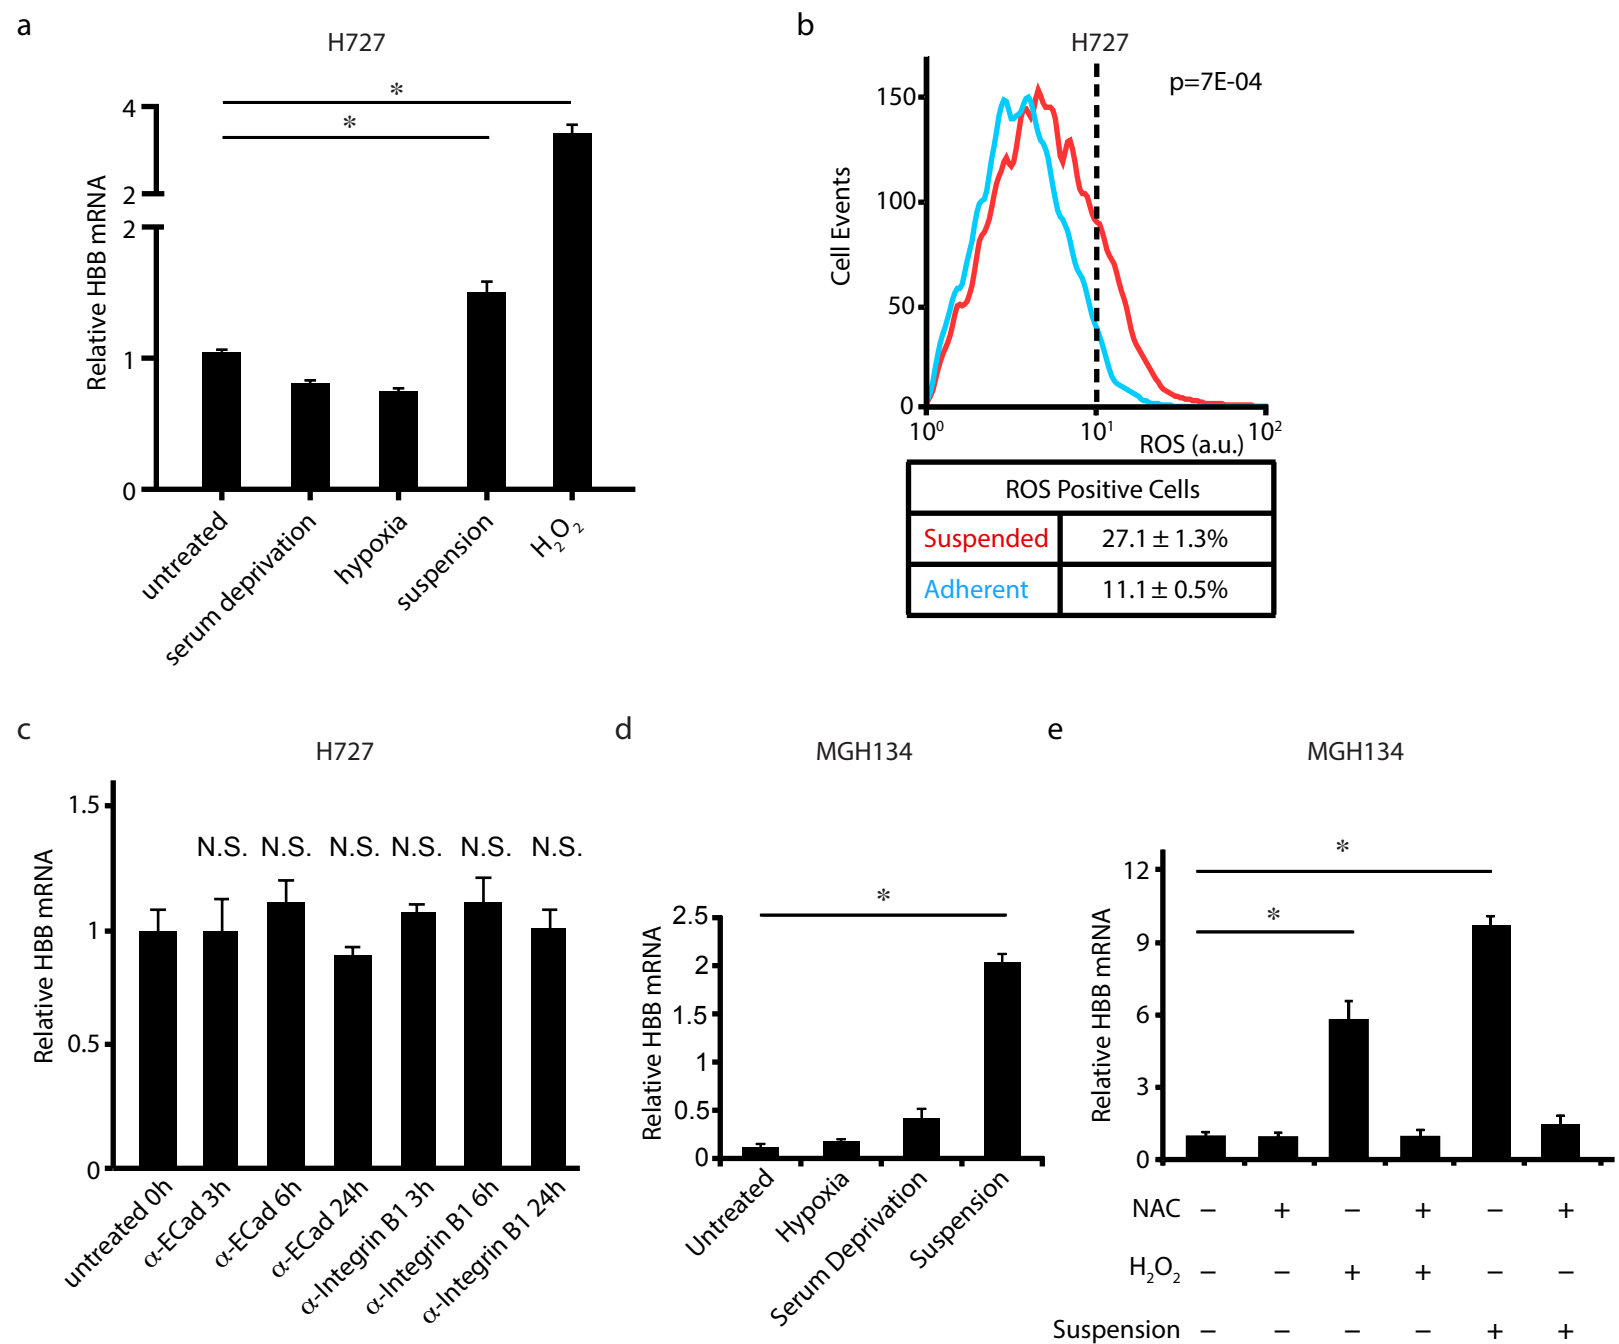

### Supplementary Figure 4. Induction of *HBB* in H727 and MGH134 cells

(a) Bar graph showing *HBB* expression in H727 cells under various stress-related environmental stimuli. (b) Flow cytometric analysis showing increased percentage of ROS positive H727 cells after 24-hour culture in suspension, as detected by H2DCFDA dye. (c) Bar graph showing normalized *HBB* mRNA levels in H727 cells after the treatment with integrin or E-cadherin blocking antibody in a 24-hour time course experiment. (d) Bar graph showing normalized *HBB* mRNA levels in MGH134 cells under multiple stress conditions. (e) Bar graph showing normalized *HBB* mRNA levels in MGH134 cells under suspension and following H<sub>2</sub>O<sub>2</sub> treatment. Pretreating cells with 1mM NAC blocks the induction of *HBB* by suspension or H<sub>2</sub>O<sub>2</sub> treatment. All data are represented as mean ± SD. n= 3; \* denotes a statistical significance at P<0.05 (t-Test).

a

| GeneSymbol | chandran2007a | taylor2010_new | varambally2005 |
|------------|---------------|----------------|----------------|
| ATF5       | 0.540804491   | 0.188460582    | 0.653521174    |
| ASCL1      | 0.170741346   | 0.184628596    | 0.726453251    |
| MTA1       | 0.415950856   | 0.178953928    | 0.7357646      |
| ONECUT2    | 0.369520336   | 0.277543656    | 0.735569676    |
| MBD3       | 0.313013327   | 0.23324292     | 0.701883629    |
| HOXB6      | 0.34251757    | 0.273489169    | 0.589624433    |
| MYBL2      | 0.333360059   | 0.484158302    | 0.803181676    |
| SOX4       | 0.284981807   | 0.146606414    | 0.752839712    |
| FOXM1      | 0.440039695   | 0.361838289    | 0.802208221    |
| ZNF273     | 0.337571627   | 0.224205857    | 0.884414109    |
| MLXIP      | 0.405814111   | 0.21592261     | 0.619839501    |
| EZH2       | 0.363024648   | 0.122011651    | 0.765122705    |
| FOXA2      | 0.300022172   | 0.177660539    | 0.875635881    |

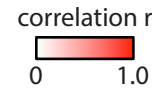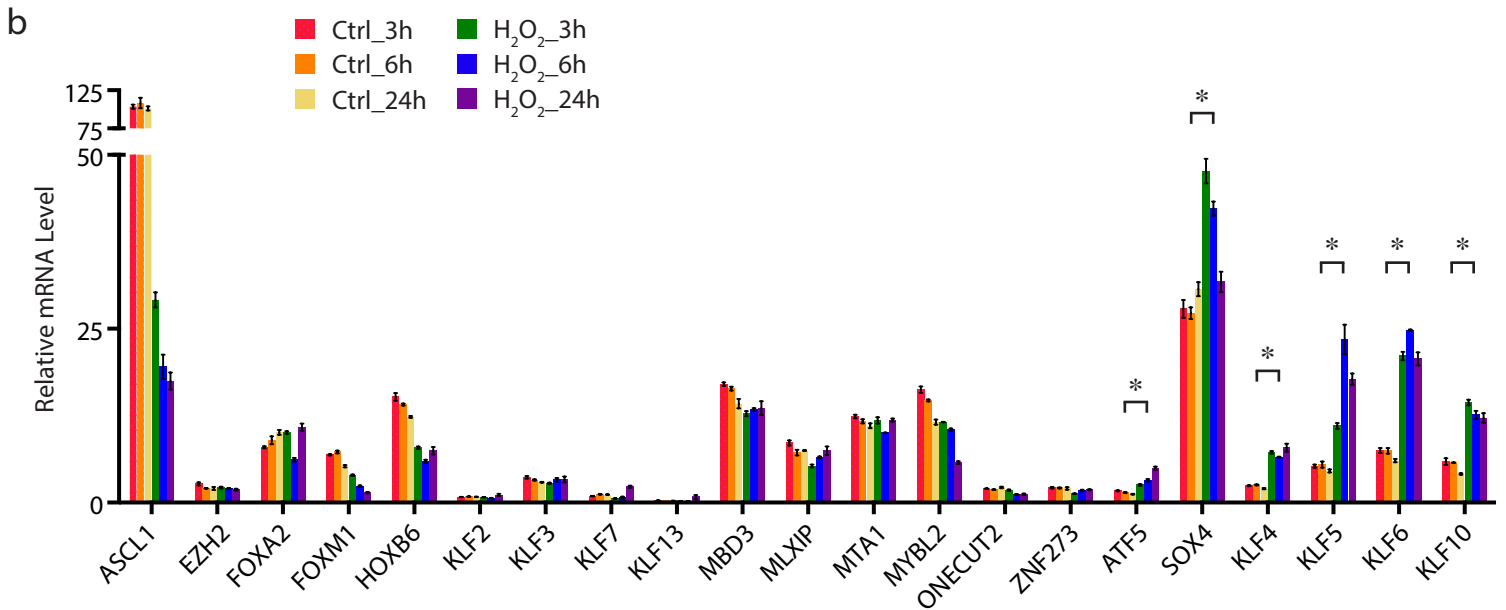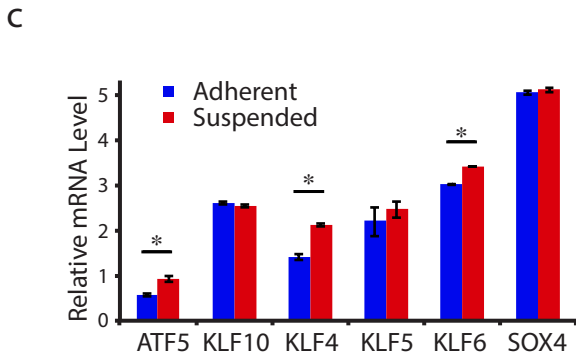

**Supplementary Figure 5. Identification of transcriptional regulators that mediate *HBB* induction**

(a) Heatmap of the correlation coefficients between each candidate transcription regulator and *HBB* in three publicly available datasets. (b) Bar graph showing normalized mRNA levels of all candidate transcription regulators in untreated and hydrogen peroxide-treated H727 cells at various time points. (c) Bar graph showing normalized mRNA levels of *ATF5*, *KLF10*, *KLF4*, *KLF5*, *KLF6* and *SOX4* in H727 cells under adherent or suspension conditions. All data are represented as mean  $\pm$  SD. n = 3; \* denotes a statistical significance at P < 0.05 (t-Test).

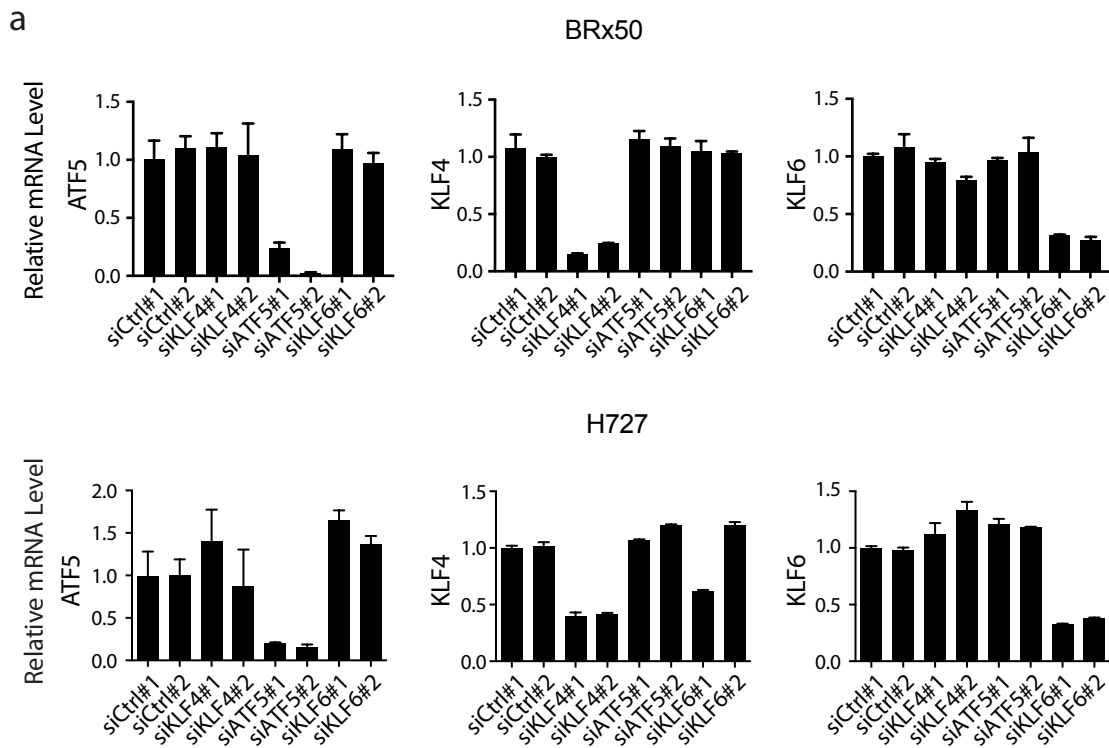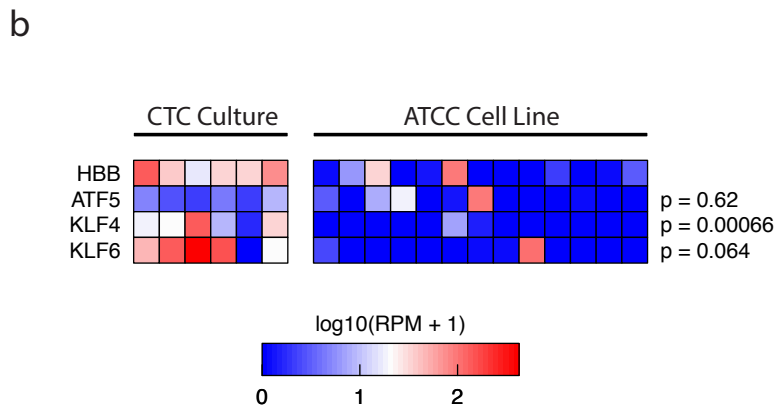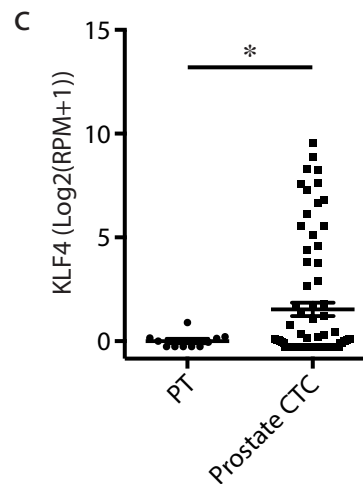

**Supplementary Figure 6. Identification of *KLF4* as a transcriptional factor that mediates *HBB* induction**  
 (a) Bar graph showing the knockdown efficiency of siRNAs against *ATF5*, *KLF4* or *KLF6* in BRx50 and H727 cells. Data are represented as mean  $\pm$  SD. n= 3. (b) Heatmap showing the expression of *HBB*, *ATF5*, *KLF4* and *KLF6* in cultured breast CTC lines and ATCC breast cancer cell lines. p values for the correlation coefficients between each gene and *HBB* are indicated on the right. (c) Scatter plot showing the expression of *KLF4* in prostate CTCs compared with primary prostate tumor samples. Data are represented as mean  $\pm$  SEM. \* denotes a statistical significance at  $P < 0.05$  (t-Test).

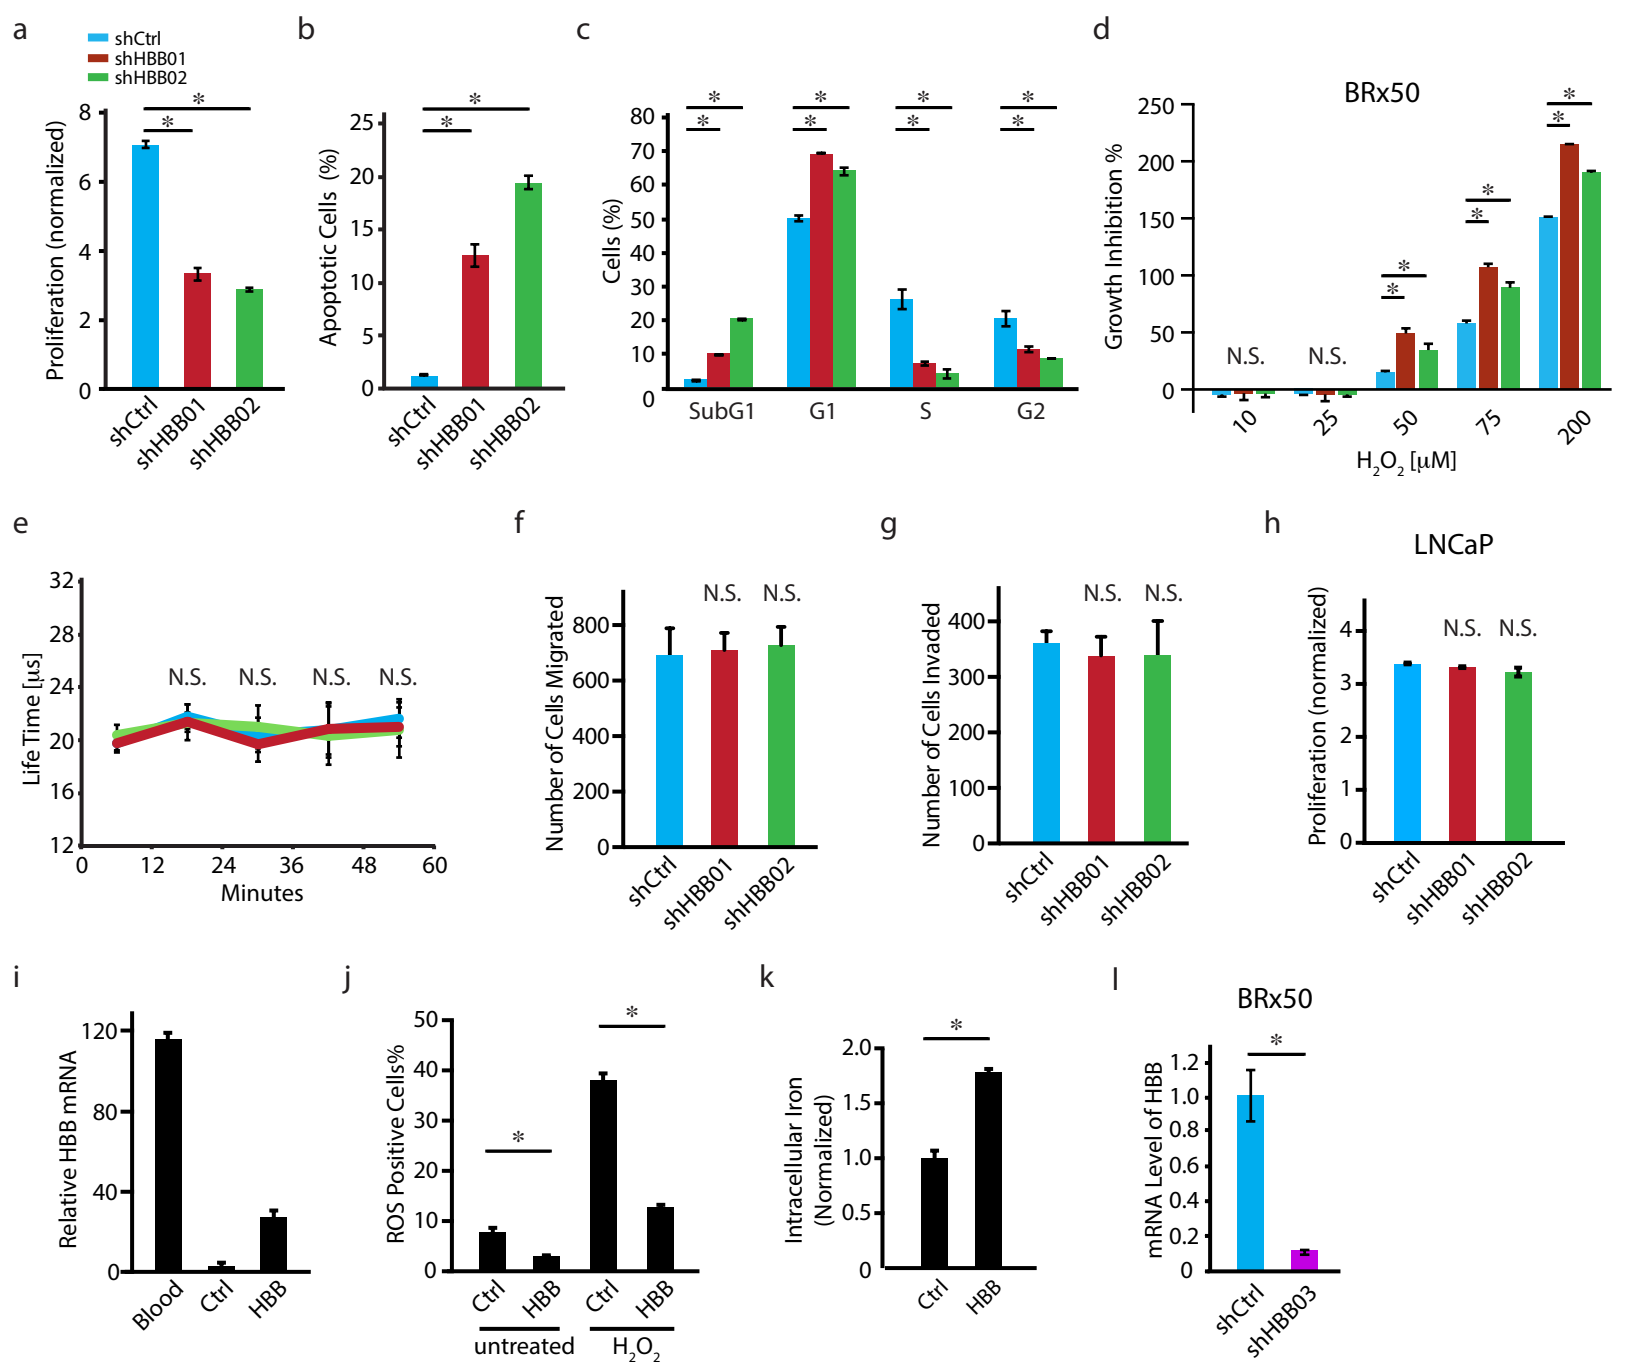

### Supplementary Figure 7. Pro-survival function of *HBB* against oxidative stress in cancer cells

(a) Bar graph showing that *HBB* depletion reduces the proliferation of H727 cells (measured at day 5). (b) Bar graph showing increased apoptosis in *HBB*-depleted H727 cells (Annexin V apoptosis assay) at the same timepoint. (c) Bar graph shows that *HBB* depletion increases the percentage of H727 cells in subG1 and G1 phases, accompanied by decreases in S and G2 phases. (d) Bar graph showing increased sensitivity to various doses of H<sub>2</sub>O<sub>2</sub> in *HBB*-depleted BRx50 cells compared with control cells. (e) Line graph showing the lifetime (μs) of an intracellular O<sub>2</sub> sensor probe over a period of 60 minutes. No difference in intracellular O<sub>2</sub> level was observed between control and *HBB*-depleted H727 cells. (f-g) Bar graph showing unchanged migration and invasive potential in *HBB*-depleted H727 cells in Boyden chamber assays. 20ng/ml HGF was used as chemoattractant. (h) Bar graph showing that proliferation of LNCaP cells is not affected by *HBB* shRNAs. (i) Real-time PCR showing the relative *HBB* mRNA levels in H727 at baseline (Ctrl) or following stable expression of ectopic *HBB*. Expression levels of *HBB* in a blood sample are shown for comparison. (j) Bar graph showing that ectopic overexpression of *HBB* in H727 cells reduces intracellular ROS under basal conditions and following treatment with hydrogen peroxide. (k) Bar graph showing increased total iron within H727 cells overexpressing *HBB* compared with control cells. (l) Bar graph showing the knockdown efficiency of *HBB* shRNA#3 in a cultured breast CTC line BRx50. All data (a-l) are represented as mean ± SD. n=3; \* denotes a statistical significance at P<0.05.

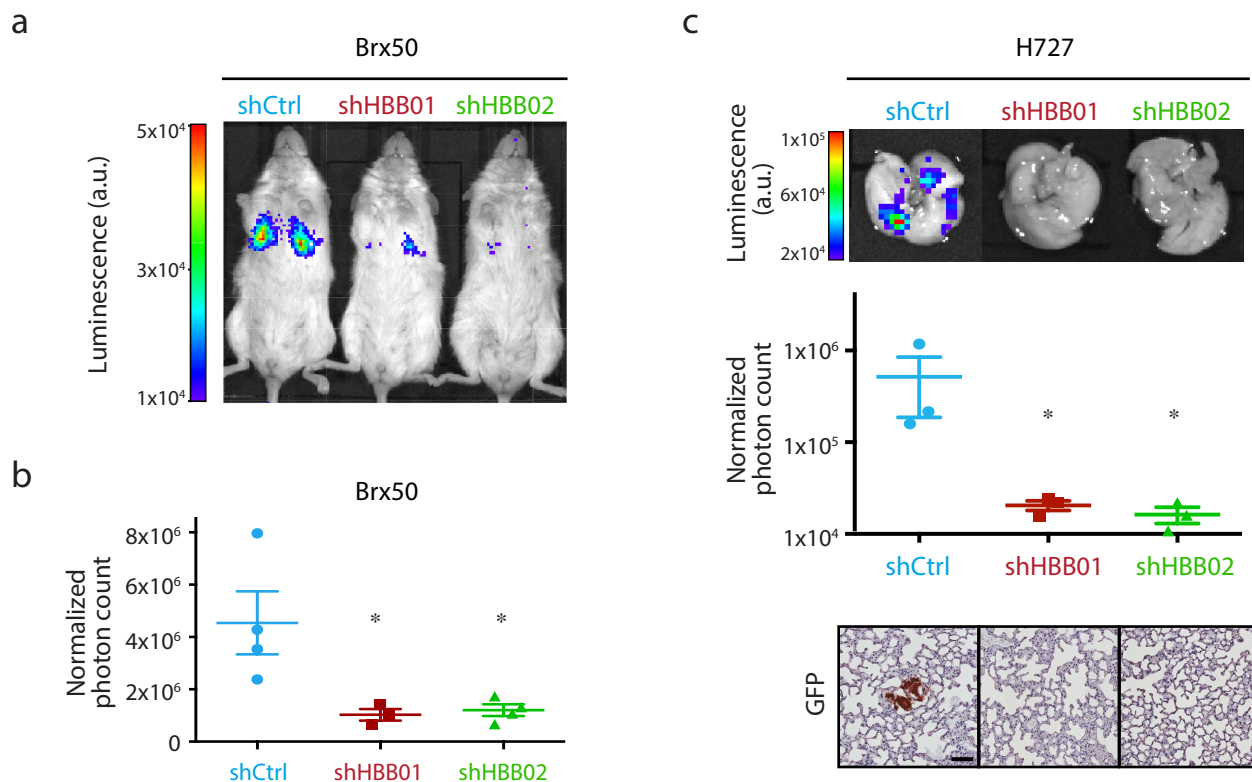

**Supplementary Figure 8. Pro-survival function of *HBB* against oxidative stress in BRx50 and H727 cells in vivo**

(a) Representative images of mice intravenously injected with BRx50 cells expressing control shRNAs or shRNAs against *HBB* at the end time point day 33 (luminescence by IVIS imaging). (b) Scatter plot showing quantitative normalized lung photon counts for each mouse at day 33. (c) Mouse intravenous injection model showing impaired metastatic potential of H727 cells upon *HBB* depletion. Top: representative images of isolated whole lung, at day 63 following intravenous injection of H727 cells expressing either control or *HBB*-targeting shRNAs (luminescence by IVIS imaging). Middle: Scatter plot showing normalized lung photon counts for each mouse at day 63. Bottom: representative images of the lung tissue immunohistochemistry using GFP antibodies. Scale bar, 100 $\mu$ m. Data are represented as mean  $\pm$  SEM. n=3; \* denotes a statistical significance at P<0.05 (t-Test).



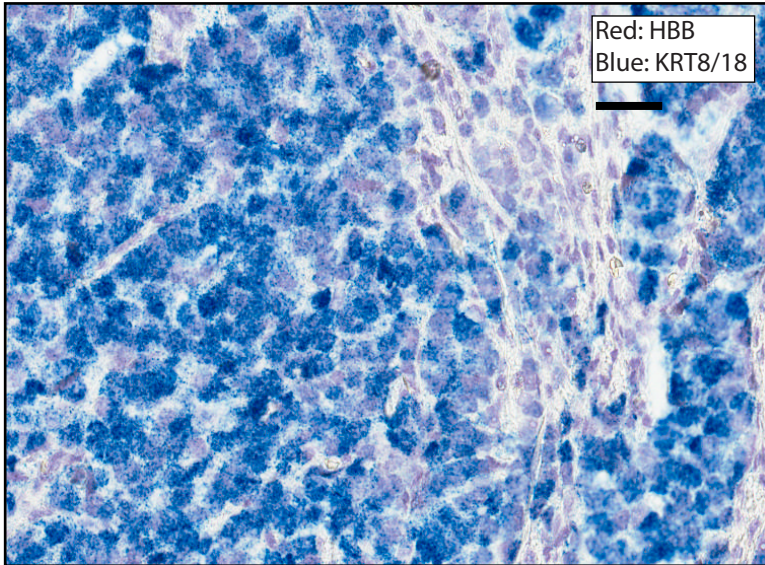

PCa Primary Tumor (N=9 pts)

**Supplementary Figure 9. RNA in-situ hybridization assay of *HBB* in localized prostate tumors**

Representative micrograph (40x) of RNA-in situ hybridization assay showing *HBB* and *KRT8/18* expression in localized prostate tumors Scale Bar, 25 $\mu$ m.

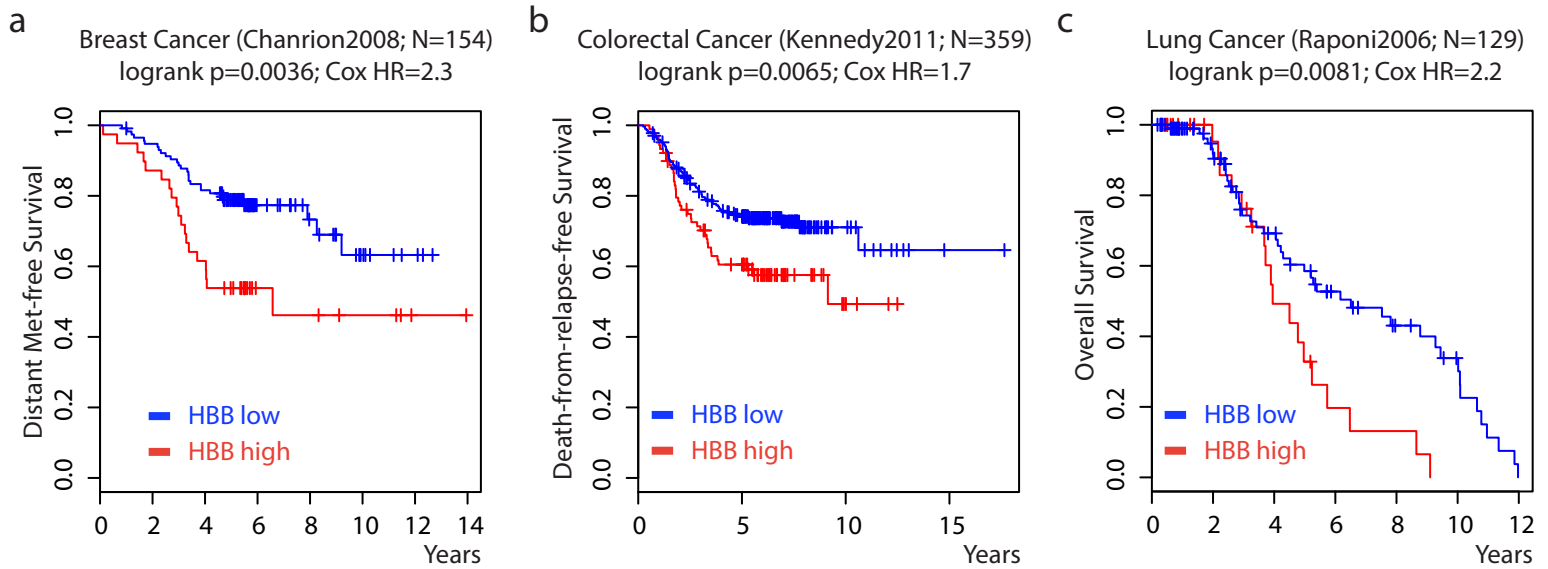

**Supplementary Figure 10. Correlation of *HBB* expression with poor patient prognosis in multiple cancer types**

(a) Kaplan-Meier survival curve of breast cancer patients showing expression of *HBB* is associated with occurrence of distant metastasis ( $n=154$ ,  $p=0.0036$ ). (b) Kaplan-Meier survival curve of colorectal cancer patients showing higher expression of *HBB* is associated with poor death-from-relapse-free survival ( $n=359$ ,  $p=0.0065$ ). (c) A Kaplan-Meier survival curve of lung cancer patients showing higher expression of *HBB* is associated with poor overall survival ( $n=129$ ,  $p=0.0081$ ). Red: patients with *HBB* expression above upper quartile. Blue: below upper quartile.

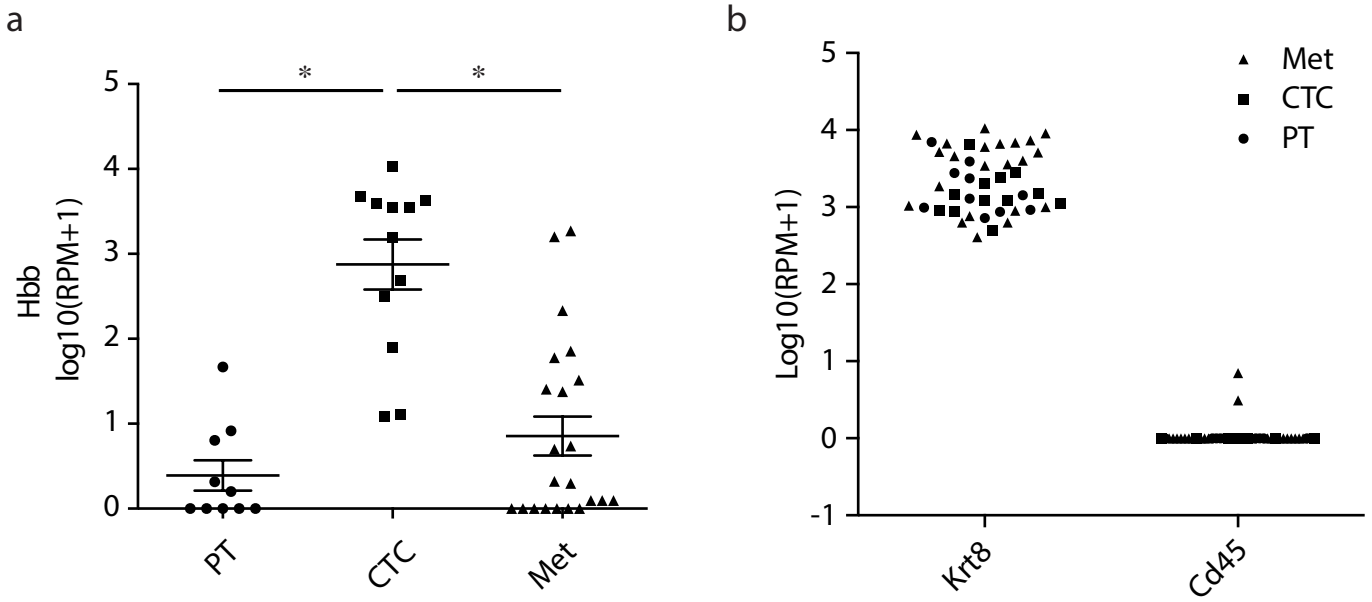

**Supplementary Figure 11. RNA levels of *Hbb* in single CTCs and primary and metastatic prostate tumor cells**  
 (a) Scatter plot showing *Hbb* mRNA expression in single CTCs and single primary and metastatic tumor cells from a metastatic prostate cancer mouse model. Data are represented as mean  $\pm$  SEM. \* denotes  $p < 0.05$  (t-Test). (b) Scatter plot showing abundant expression of epithelial lineage marker *Krt8* and minimal or absent expression of the hematopoietic lineage marker *Cd45* in single cells shown in A.

### Radiographic progression

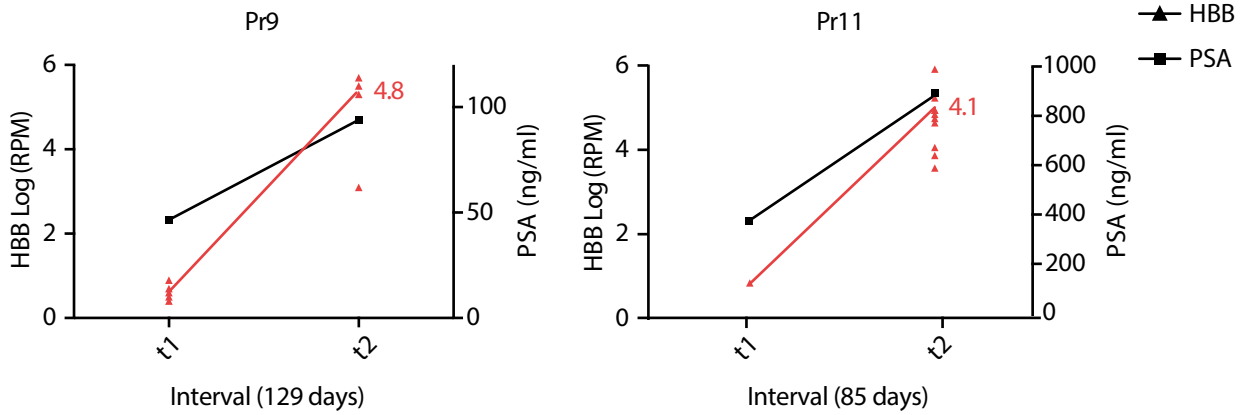

### Radiographic stable disease

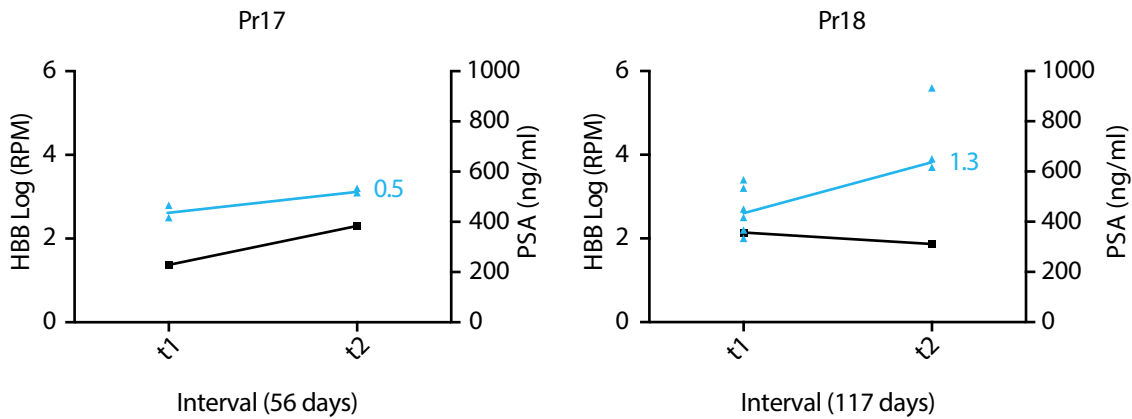

**Supplementary Figure 12. Increased *HBB* expression in CTCs from CRPC patients with disease progression**  
Graphs showing changes in *HBB* levels in CTCs from serial blood draws from four different CRPC patients (Numbers on the right of the line indicate the log fold change of *HBB*). PSA levels are plotted according to the right Y axis. Intervals are indicated at the X axis.

Up in CTCs  
 $p = 0.026$  Expected = 9.5 OR = 1.8

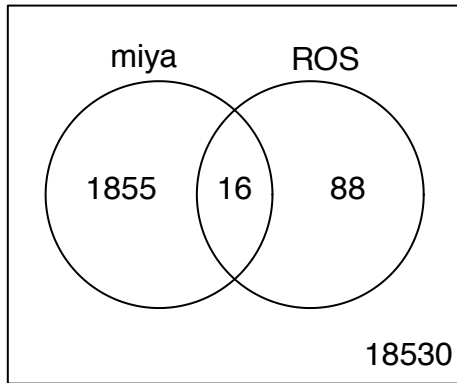

Down in CTCs  
 $p = 0.8$  Expected = 1.6 OR = 0.6

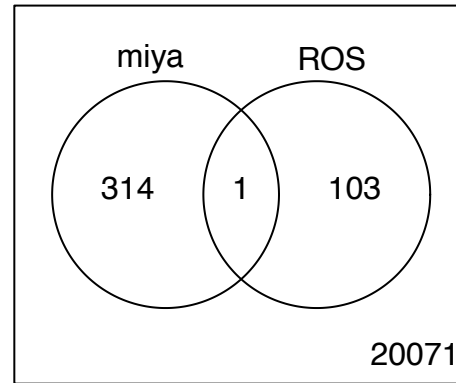

**Supplementary Figure 13. Antioxidant genes differentially expressed in prostate CTCs and primary tumors**  
Venn diagram showing the intersection of genes that are upregulated or downregulated in prostate CTCs versus primary tumor and genes that are involved in ROS regulation.

**Supplementary Table 1. List of datasets used for Kaplan-Meier survival analysis**

| Type       | Data set name        | Survival type                    | p-value     | Hazard ratio | FDR         | Pubmed ID | Data source                                                             |
|------------|----------------------|----------------------------------|-------------|--------------|-------------|-----------|-------------------------------------------------------------------------|
| breast     | chanion2008          | Overall survival                 | 0.004440365 | 2.373981843  | 0.09477495  | 18347175  | GEO GSE9893                                                             |
| breast     | pawltan2005          | Overall survival                 | 0.043025676 | 0.393252865  | 0.301179731 | 16280042  | GEO GSE1456                                                             |
| breast     | sabatie2010          | Relapse-free survival            | 0.076414616 | 0.605049853  | 0.382073078 | 20490655  | GEO GSE21653                                                            |
| breast     | vantveer2002.new     | Distant met-free survival        | 0.114455465 | 1.651899316  | 0.421256667 | 11823860  | *                                                                       |
| breast     | chin2006             | Overall survival                 | 0.123694826 | 1.620340824  | 0.421256667 | 17157792  | **                                                                      |
| breast     | schmidt2008          | Distant met-free survival        | 0.141479895 | 0.551782129  | 0.421256667 | 18593943  | GEO GSE11121                                                            |
| breast     | zhou2007             | Relapse-free survival            | 0.144430857 | 3.82E-09     | 0.421256667 | 17407600  | GEO GSE7378                                                             |
| breast     | buffa2011            | Distant met-free survival        | 0.167724267 | 0.682382936  | 0.4306528   | 21737487  | GEO GSE22219                                                            |
| breast     | ivshina2006          | Relapse-free survival            | 0.17226112  | 0.703111574  | 0.4306528   | 17079448  | GEO GSE4922                                                             |
| breast     | loi2008.new          | Distant met-free survival        | 0.237729979 | 0.308557463  | 0.554703285 | 18498629  | GEO GSE9195                                                             |
| breast     | wang2005.new2        | Distant met-free survival        | 0.31657109  | 0.7924576    | 0.651764008 | 15721472  | GEO GSE2034                                                             |
| breast     | tcga_brca            | Overall survival                 | 0.40290278  | 0.838709085  | 0.717091172 | 23000897  | <a href="http://cancergenome.nih.gov/">http://cancergenome.nih.gov/</a> |
| breast     | sotirou2006.new      | Distant met-free survival        | 0.414527227 | 0.73449198   | 0.717091172 | 16478745  | GEO GSE2990                                                             |
| breast     | finak2008.new        | Relapse-free survival            | 0.447551155 | 0.557435028  | 0.717091172 | 18438415  | GEO GSE9014                                                             |
| breast     | vandevijver2002.new  | Overall survival                 | 0.450743022 | 1.208305562  | 0.717091172 | 12490681  | ***                                                                     |
| breast     | vandevijver2002.new2 | Overall survival                 | 0.450743022 | 1.208305562  | 0.717091172 | 12490681  | ****                                                                    |
| breast     | minn2007.new         | Distant met-free survival        | 0.524002986 | 0.610689942  | 0.764171021 | 17420468  | GEO GSE5327                                                             |
| breast     | ma2004               | Distant met-free survival        | 0.608890784 | 0.788835566  | 0.841942569 | 15193263  | GEO GSE1378                                                             |
| breast     | li2010               | Distant met-free survival        | 0.662601517 | 0.767691824  | 0.841942569 | 20098429  | GEO GSE19615                                                            |
| breast     | desmedt2007          | Overall survival                 | 0.668521832 | 1.128873265  | 0.841942569 | 17545524  | GEO GSE7390                                                             |
| breast     | bos2009.new          | Distant met-free survival        | 0.738997649 | 0.942640297  | 0.841942569 | 19421193  | GEO GSE12276                                                            |
| breast     | minn2005.new         | Distant met-free survival        | 0.986714593 | 0.993991634  | 0.989038922 | 16049480  | GEO GSE2603                                                             |
| breast     | symmans2010          | Relapse-free survival            | 0.989038922 | 1.003778535  | 0.989038922 | 20697068  | GEO GSE17705                                                            |
| colorectal | kennedy2011          | Death from disease-free survival | 0.006502282 | 1.723747679  | 0.09477495  | 22067406  | Array Express E-MTAB-863 & E-MTAB-864                                   |
| colorectal | staub2009            | Overall survival                 | 0.021494061 | 3.496972697  | 0.188073031 | 19399471  | GEO GSE12945                                                            |
| colorectal | jorissen2009         | Relapse-free survival            | 0.118887644 | 0.75986701   | 0.421256667 | 19996206  | GEO GSE14333                                                            |
| colorectal | smith2010            | Overall survival                 | 0.497489493 | 0.847201652  | 0.757049229 | 19914252  | GEO GSE17536 GSE17537                                                   |
| lung       | rapon2006            | Overall survival                 | 0.008123567 | 2.152995479  | 0.09477495  | 16885343  | GEO GSE4573                                                             |
| lung       | takeuchi2006         | Overall survival                 | 0.057287803 | 0.572537915  | 0.334178849 | 16549822  | GEO GSE11969                                                            |
| lung       | tomida2009           | Overall survival                 | 0.259985574 | 0.672126181  | 0.568718443 | 19414676  | GEO GSE13213                                                            |
| lung       | lee2008              | Relapse-free survival            | 0.738140756 | 0.909246473  | 0.841942569 | 19010856  | GEO GSE8894                                                             |
| lung       | zhu2010              | Overall survival                 | 0.794166111 | 0.905246142  | 0.868619184 | 20823422  | GEO GSE14814                                                            |
| prostate   | taylor2010.new       | Overall survival                 | 0.727099903 | 0.745855254  | 0.841942569 | 20579941  | GEO GSE21034                                                            |
| prostate   | shoner2010.v2        | Overall survival                 | 0.745720561 | 0.945991625  | 0.841942569 | 20233430  | GEO GSE16560                                                            |
| prostate   | long2014             | Relapse-free survival            | 0.850310163 | 0.950163709  | 0.901844112 | 24713434  | GEO GSE54460                                                            |

\* <http://www.rii.com/publications/2002/vantveer.html> <http://www.nature.com/nature/journal/v415/n6871/supinfo/415530a.html>

\*\* <https://caarraydb.nci.nih.gov/caarray/publicExperimentDetailAction.do?expid=1015897589973255>

\*\*\* <http://www.rii.com/publications/2002/nejm.htm> [http://microarray-pubs.stanford.edu/wound\\_NKI/Clinical\\_Data\\_Supplement.xls](http://microarray-pubs.stanford.edu/wound_NKI/Clinical_Data_Supplement.xls)

\*\*\*\* <http://www.rii.com/publications/2002/nejm.htm> [http://microarray-pubs.stanford.edu/wound\\_NKI/Clinical\\_Data\\_Supplement.xls](http://microarray-pubs.stanford.edu/wound_NKI/Clinical_Data_Supplement.xls)

**Supplementary Table 2. Antioxidant genes upregulated or downregulated in prostate CTCs**

| Symbol   | Name                                         | Fold-change | p-value     |
|----------|----------------------------------------------|-------------|-------------|
| HBB      | Hemoglobin, beta                             | 19.5        | 1.89582E-06 |
| ALDH18A1 | Aldehyde dehydrogenase 18 family, member A1  | 4.5         | 1.65554E-08 |
| ALDH9A1  | Aldehyde dehydrogenase 9 family, member A1   | 7.8         | 3.29345E-10 |
| ATOX1    | ATX1 antioxidant protein 1 homolog (yeast)   | 6.0         | 2.33945E-09 |
| CAT      | Catalase                                     | 2.1         | 6.91411E-05 |
| CSDE1    | Cold shock domain containing E1, RNA-binding | 12.4        | 0.000139708 |
| MPV17    | MpV17 mitochondrial inner membrane protein   | 2.9         | 0.005447409 |
| PNKP     | Polynucleotide kinase 3'-phosphatase         | 2.4         | 1.25665E-05 |
| PRDX1    | Peroxiredoxin 1                              | 24.4        | 3.21909E-05 |
| PRDX2    | Peroxiredoxin 2                              | 11.5        | 0.008957268 |
| PRDX3    | Peroxiredoxin 3                              | 6.2         | 6.89518E-08 |
| PRDX4    | Peroxiredoxin 4                              | 17.4        | 9.32281E-11 |
| PRDX5    | Peroxiredoxin 5                              | 3.6         | 0.001381065 |
| PRDX6    | Peroxiredoxin 6                              | 16.4        | 0.000272133 |
| RNF7     | Ring finger protein 7                        | 7.0         | 1.89227E-07 |
| SOD1     | Superoxide dismutase 1, soluble              | 17.7        | 0.002003694 |
| VIMP     | VCP-interacting membrane protein             | 3.0         | 7.3866E-06  |
| ALDH1A3  | Aldehyde dehydrogenase 1 family, member A3   | 0.12        | 0.01942927  |

### Supplementary Table 3. Patient CTC samples with corresponding GEO accession ID

#### Prostate CTC Samples

| GEO accession | Sample ID |
|---------------|-----------|
| GSM1660118    | Pr10.2.2  |
| GSM1660119    | Pr11.1.1  |
| GSM1660120    | Pr11.2.2  |
| GSM1660121    | Pr11.3.1  |
| GSM1660122    | Pr11.3.2  |
| GSM1660123    | Pr11.3.3  |
| GSM1660124    | Pr11.4.1  |
| GSM1660125    | Pr11.4.2  |
| GSM1660126    | Pr11.4.3  |
| GSM1660127    | Pr11.4.4  |
| GSM1660128    | Pr11.4.5  |
| GSM1660129    | Pr11.4.6  |
| GSM1660130    | Pr14.1.1  |
| GSM1660131    | Pr14.2.1  |
| GSM1660132    | Pr14.2.2  |
| GSM1660133    | Pr14.2.3  |
| GSM1660134    | Pr14.2.4  |
| GSM1660135    | Pr14.2.5  |
| GSM1660136    | Pr14.2.6  |
| GSM1660137    | Pr14.3.1  |
| GSM1660138    | Pr14.3.4  |
| GSM1660139    | Pr14.3.5  |
| GSM1660140    | Pr14.3.6  |
| GSM1660141    | Pr15.1.1  |
| GSM1660142    | Pr17.1.1  |
| GSM1660143    | Pr17.1.2  |
| GSM1660144    | Pr17.2.1  |
| GSM1660145    | Pr17.2.2  |
| GSM1660146    | Pr9.1.1   |
| GSM1660147    | Pr9.1.2   |
| GSM1660148    | Pr9.1.3   |
| GSM1660149    | Pr9.1.4   |
| GSM1660150    | Pr9.1.6   |
| GSM1660151    | Pr9.3.1   |
| GSM1660152    | Pr9.3.6   |
| GSM1660153    | Pr9.3.7   |
| GSM1660154    | Pr9.3.8   |
| GSM1660155    | Pr18.1.1  |
| GSM1660156    | Pr18.1.4  |

#### Breast CTC Samples

| GEO accession | Sample ID |
|---------------|-----------|
| GSM1660157    | Pr18.1.5  |
| GSM1660158    | Pr18.1.6  |
| GSM1660159    | Pr18.1.7  |
| GSM1660160    | Pr18.1.8  |
| GSM1660161    | Pr18.2.1  |
| GSM1660162    | Pr18.2.2  |
| GSM1660163    | Pr18.2.3  |
| GSM1660164    | Pr19.1.2  |
| GSM1660165    | Pr19.1.3  |
| GSM1660166    | Pr19.1.4  |
| GSM1660167    | Pr19.1.5  |
| GSM1660168    | Pr20.1.1  |
| GSM1660169    | Pr21.1.1  |
| GSM1660170    | Pr21.1.10 |
| GSM1660171    | Pr21.1.11 |
| GSM1660172    | Pr21.1.12 |
| GSM1660173    | Pr21.1.2  |
| GSM1660174    | Pr21.1.3  |
| GSM1660175    | Pr21.1.4  |
| GSM1660176    | Pr21.1.5  |
| GSM1660177    | Pr21.1.6  |
| GSM1660178    | Pr21.1.7  |
| GSM1660179    | Pr21.1.8  |
| GSM1660180    | Pr21.1.9  |
| GSM1660181    | Pr22.1.10 |
| GSM1660182    | Pr22.1.11 |
| GSM1660183    | Pr22.1.12 |
| GSM1660184    | Pr22.1.2  |
| GSM1660185    | Pr22.1.4  |
| GSM1660186    | Pr22.1.5  |
| GSM1660187    | Pr22.1.6  |
| GSM1660188    | Pr22.1.7  |
| GSM1660189    | Pr22.1.8  |
| GSM1660190    | Pr22.1.9  |
| GSM1660191    | Pr3.1.1   |
| GSM1660192    | Pr6.1.1   |
| GSM1660193    | Pr6.1.2   |
| GSM1660194    | Pr6.1.5   |

| GEO accession | Sample ID       |
|---------------|-----------------|
| GSM1253375    | Patient#1_CL#1  |
| GSM1253376    | Patient#1_SC#1  |
| GSM1253377    | Patient#2_SC#1  |
| GSM1253378    | Patient#3_SC#1  |
| GSM1253379    | Patient#4_SC#2  |
| GSM1253380    | Patient#5_SC#1  |
| GSM1253381    | Patient#2_CL#1  |
| GSM1253382    | Patient#5_SC#2  |
| GSM1253383    | Patient#6_CL#1  |
| GSM1253384    | Patient#6_SC#1  |
| GSM1253385    | Patient#7_CL#1  |
| GSM1253386    | Patient#7_SC#2  |
| GSM1253387    | Patient#8_SC#1  |
| GSM1253388    | Patient#9_CL#1  |
| GSM1253389    | Patient#9_SC#1  |
| GSM1253390    | Patient#7_SC#1  |
| GSM1253391    | Patient#5_CL#1  |
| GSM1253392    | Patient#4_SC#1  |
| GSM1253393    | Patient#4_CL#3  |
| GSM1253394    | Patient#4_CL#1  |
| GSM1253395    | Patient#4_CL#2  |
| GSM1253396    | Patient#3_CL#1  |
| GSM1253397    | Patient#10_SC#1 |
| GSM1253398    | Patient#10_CL#1 |
| GSM1253399    | Patient#10_CL#2 |
| GSM1253400    | Patient#8_CL#1  |
| GSM1253401    | Patient#8_CL#2  |
| GSM1253402    | Patient#8_SC#2  |
| GSM1253403    | Patient#8_SC#3  |



#### Supplementary Table 4. Disease Status of Prostate Cancer Patients with multiple blood draws

| Patient | Stage | Disease status at time of CTC collection | PSA at first CTC collection (ng/mL) | PSA at last CTC collection (ng/mL) | Prior Treatments                     |
|---------|-------|------------------------------------------|-------------------------------------|------------------------------------|--------------------------------------|
| Pr9     | met.  | CRPC, on abiraterone                     | 46.52                               | 93.9                               | ADT                                  |
| Pr11    | met.  | CRPC, on abiraterone                     | 391                                 | 898.3                              | ADT, bic, metformin, keto, cabo, doc |
| Pr17    | met.  | CRPC, on cabazitaxel                     | 229.1                               | 384.9                              | ADT, doc, abi                        |
| Pr18    | met.  | CRPC, on enzalutamide                    | 356.8                               | 311.3                              | ADT, sipT, metformin, cabo, doc      |

**Supplementary Table 5. List of cell lines used in this study**

| Name     | Type                  |
|----------|-----------------------|
| BRx-07   | CTC_breast            |
| BRx-33   | CTC_breast            |
| BRx-42   | CTC_breast            |
| BRx-50   | CTC_breast            |
| BRx-61   | CTC_breast            |
| BRx-68   | CTC_breast            |
| HMEC     | ATCC_breast           |
| MCF10A   | ATCC_breast           |
| BT474    | ATCC_breast           |
| BT20     | ATCC_breast           |
| MDAMB231 | ATCC_breast           |
| ZR751    | ATCC_breast           |
| HCC1954  | ATCC_breast           |
| EFM19    | ATCC_breast           |
| UACC833  | ATCC_breast           |
| T47D     | ATCC_breast           |
| MCF7     | ATCC_breast           |
| MDAMB453 | ATCC_breast           |
| CAL51    | ATCC_breast           |
| PC3      | ATCC_prostate         |
| LNCaP    | ATCC_prostate         |
| VCaP     | ATCC_prostate         |
| DU145    | ATCC_prostate         |
| H727     | ATCC_lung             |
| MGH134   | NSCLC                 |
| HEK293T  | ATCC_embryonic kidney |

### Supplementary Table 6. List of datasets used for meta-analysis

| <b>Experiment ID</b> | <b>Reference</b>                       |
|----------------------|----------------------------------------|
| chandran2007a        | Chandran et al. 2007 (PMID: 17430594)  |
| chung2004            | Chung et al. 2004 (PMID: 15144956)     |
| grasso2012a          | Grasso et al. 2012 (PMID: 22722839)    |
| grasso2012b          |                                        |
| lapoint2004a         | Lapointe et al. 2004 (PMID: 14711987)  |
| lapointe2004b        |                                        |
| lee2010              | Lee et al. 2010 (PMID: 20421545)       |
| matsuyama2009        | Matsuyama et al. 2010 (PMID: 20162577) |
| murat2008            | Murat et al. 2008 (PMID: 18565887)     |
| perou_superset.new2  | Perreard et al. 2006 (PMID: 16626501)  |
| perou_superset.new3  |                                        |
| perou_superset.new4  |                                        |
| phillips2006         | Phillips et al. 2006 (PMID: 16530701)  |
| roessler2015         | Roessler et al. 2015 (PMID: 25552933)  |
| taylor2010.new       | Taylor et al. 2010 (PMID: 20579941)    |
| varambally2005       | Varambally et al.2005 (PMID: 16286247) |
| vecchi2008           | Vecchi et al. 2008 (PMID: 17952122)    |
| wuttig2010           | Wuttig et al. 2010 (PMID: 22213152)    |
| yu2012               | Yu et al. 2012 (PMID: 23251464)        |

## Supplementary Table 7. List of primers used in this study

| Primer Name | Sequences (5' -> 3')     |
|-------------|--------------------------|
| HBB_F       | ACCTTTGCCCACTGAGTG       |
| HBB_R       | GCAAGAAAGCGAGCTTAGTGATAC |
| HBB_ChIP_F  | TCCAACCTCCTAAGCCAGTGC    |
| HBB_ChIP_R  | TCTGCCCTGACTTTTATGC      |
| ASCL1_F     | CGCGGCCAACAAGAAGATG      |
| ASCL1_R     | CGACGAGTAGGATGAGACCG     |
| ATF5_F      | TGGCTCGTAGACTATGGGAAA    |
| ATF5_R      | ATCAACTCGCTCAGTCATCCA    |
| EZH2_F      | GTACACGGGGATAGAGAATGTGG  |
| EZH2_R      | GGTGGGCGGCTTTCTTTATCA    |
| FOXA2_F     | GGAGCAGCTACTATGCAGAGC    |
| FOXA2_R     | CGTGTTTCATGCCGTTTCATCC   |
| FOXM1_F     | ATACGTGGATTGAGGACCACT    |
| FOXM1_R     | TCCAATGTCAAGTAGCGGTTG    |
| HOXB6_F     | GTGCTCCACTCCGGTCTAC      |
| HOXB6_R     | GTAACGTGTGTATGTCTGGCG    |
| KLF10_F     | CAGACCTGTTACACCAGTATC    |
| KLF10_R     | GGGTTCAAAGTCAGAAGGAC     |
| KLF13_F     | CGGCCTCAGACAAAGGGTC      |
| KLF13_R     | TTCCCGTAAACTTTCTCGCAG    |
| KLF2_F      | TGCCGTCCTTCTCCACTTTC     |
| KLF2_R      | AAGTCCAGCACGCTGTTGAG     |
| KLF3_F      | TACACAAGTCACCTCCAGC      |
| KLF3_R      | TGTCCTCTGTGGTTCGATCC     |
| KLF4_F      | CCTGGACCTGGACTTTATTC     |
| KLF4_R      | GGATCGGATAGGTGAAGCTG     |
| KLF5_F      | ACCTGGTCCAGACAAGATG      |
| KLF5_R      | TCTACGACTGAGGCACTGTC     |
| KLF6_F      | GAGCCCTGCTATGTTTCAG      |
| KLF6_R      | GTTCCGATTCCCTCTTTTCTC    |
| KLF7_F      | TGGACATCTTGCTCTCTCG      |
| KLF7_R      | ATGAGGTCAGTGCCTGAG       |
| MBD3_F      | CTGAGCACCTTCGACTTCCG     |
| MBD3_R      | CCGGCTGCTTGAAGATGGA      |
| MLXIP_F     | TGGTGTGGAAGAATGCCCG      |
| MLXIP_R     | AGGATGCTGCTGTGGAACTC     |
| MTA1_F      | CATCAGAGGCCAACCTTTTCG    |
| MTA1_R      | GCACGTATCTGTCCGGTGGTC    |
| MYBL2_F     | CTTGAGCGAGTCCAAAGACTG    |
| MYBL2_R     | AGTTGGTCAGAAGACTTCCCT    |
| ONECUT2_F   | GGAATCCAAAACCGTGGAGTAA   |
| ONECUT2_R   | CTCTTTGCGTTTGCACGCTG     |
| SOX4_F      | GACCTGCTCGACCTGAACC      |
| SOX4_R      | CCGGGCTCGAAGTTAAAATCC    |
| ZNF273_F    | ATGGTAGCCAAACCCAGTTG     |
| ZNF273_R    | ATCCGCACTTTTACAGCC       |
